# Supplementary material for: CLytA-DAAO, Free and Immobilized in Magnetic Nanoparticles, Induces Cell Death in Human Cancer Cells
Source: MDPI journal article supplement (doi:10.3390/biom10020222), 2020-02-03
Supplement: s1 [file s1]

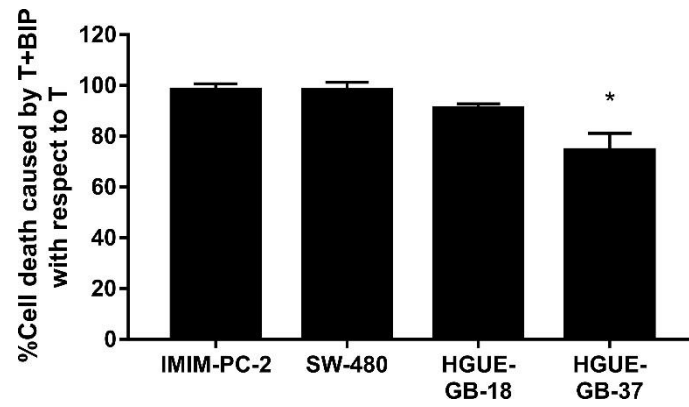

**Figure S1.** IMIM-PC-2, SW-480, HGUE-GB-18 and HGUE-GB-37 cells were treated with 2 U mL<sup>-1</sup> free CLytA-DAAO and 1 mM D-Ala in the presence or absence of 200  $\mu$ M of Bax-inhibiting peptide, V5 (BIP). Then, viability was determined by flow cytometry analysis. Data represents the percentage of CLytA-DAAO induced cell death in the presence of BIP taking the CLytA-DAAO induced cell death in the absence of BIP as the 100%. Data are presented as mean  $\pm$  SEM with  $n \geq 3$ . \* indicates  $p < 0.05$ .
